# Supplementary material for: A Retrospective Analysis of Influence of Environmental/Air Temperature and Relative Humidity on SARS-CoV-2 Outbreak
Source: Preprints.org preprint supplement (doi:10.20944/preprints202003.0325.v1), 2020-03-23

Hebei/Humidity vs Infected  
 $t(12) = 0.888, p = 0.370, \hat{\beta}_{Humidity} = 0.382, CI_{Hum} [0.282, 0.713], n_{Hum} = 14$

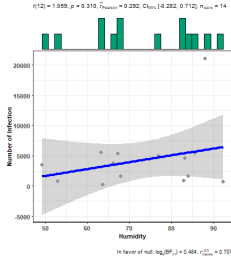

Zhejiang/Humidity vs Infected  
 $t(12) = 0.780, p = 0.448, \hat{\beta}_{Humidity} = 0.228, CI_{Hum} [0.347, 0.675], n_{Hum} = 14$

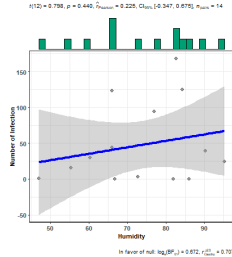

Guangdong/Humidity vs Infected  
 $t(12) = 0.888, p = 0.378, \hat{\beta}_{Humidity} = 0.189, CI_{Hum} [0.380, 0.694], n_{Hum} = 14$

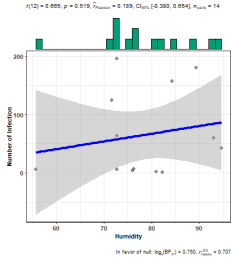

Henan/Humidity vs Infected  
 $t(12) = 0.688, p = 0.503, \hat{\beta}_{Humidity} = 0.228, CI_{Hum} [0.813, 0.848], n_{Hum} = 14$

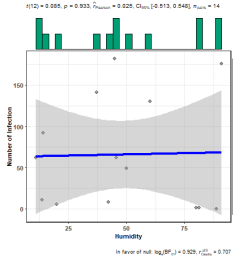

Hunan/Humidity vs Infected  
 $t(12) = 1.285, p = 0.224, \hat{\beta}_{Humidity} = 0.347, CI_{Hum} [0.228, 0.741], n_{Hum} = 14$

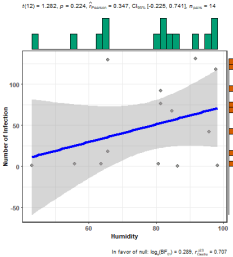

Anhui/Humidity vs Infected  
 $t(12) = 0.823, p = 0.427, \hat{\beta}_{Humidity} = 0.231, CI_{Hum} [0.341, 0.676], n_{Hum} = 14$

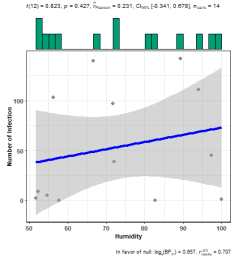

Jiangxi/Humidity vs Infected  
 $t(12) = 1.946, p = 0.075, \hat{\beta}_{Humidity} = 0.485, CI_{Hum} [0.058, 0.910], n_{Hum} = 14$

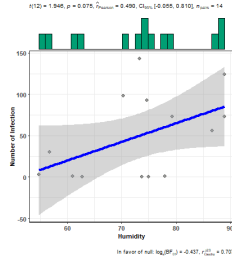

Chongqing/Humidity vs Infected  
 $t(12) = 0.882, p = 0.396, \hat{\beta}_{Humidity} = 0.273, CI_{Hum} [0.302, 0.702], n_{Hum} = 14$

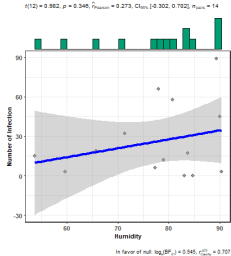

Sichuan/Humidity vs Infected  
 $t(12) = 0.681, p = 0.509, \hat{\beta}_{Humidity} = 0.103, CI_{Hum} [0.376, 0.695], n_{Hum} = 14$

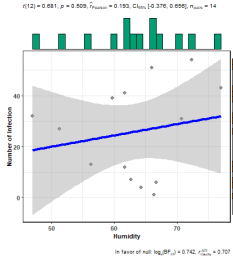

Shandong/Humidity vs Infected  
 $t(12) = -1.388, p = 0.187, \hat{\beta}_{Humidity} = 0.287, CI_{Hum} [0.791, 0.791], n_{Hum} = 14$

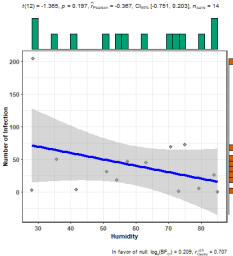

Jiangsu/Humidity vs Infected  
 $t(12) = 1.217, p = 0.247, \hat{\beta}_{Humidity} = 0.231, CI_{Hum} [0.242, 0.733], n_{Hum} = 14$

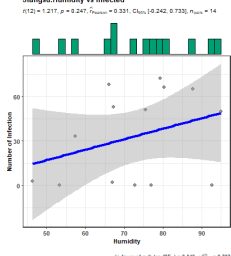

Shanghai/Humidity vs Infected  
 $t(12) = 0.246, p = 0.808, \hat{\beta}_{Humidity} = 0.071, CI_{Hum} [0.477, 0.938], n_{Hum} = 14$

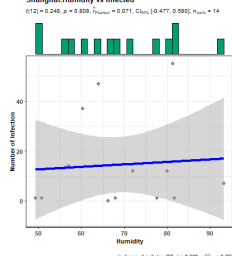

Beijing/Humidity vs Infected  
 $t(12) = 0.695, p = 0.506, \hat{\beta}_{Humidity} = 0.186, CI_{Hum} [0.382, 0.692], n_{Hum} = 14$

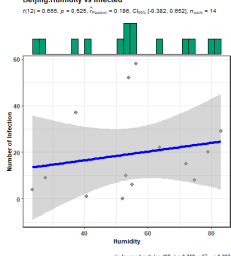

Fujian/Humidity vs Infected  
 $t(12) = 0.182, p = 0.857, \hat{\beta}_{Humidity} = 0.035, CI_{Hum} [0.490, 0.695], n_{Hum} = 14$

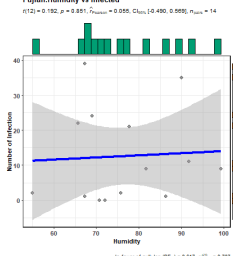

Shaanxi/Humidity vs Infected  
 $t(12) = 0.694, p = 0.513, \hat{\beta}_{Humidity} = 0.281, CI_{Hum} [0.283, 0.712], n_{Hum} = 14$

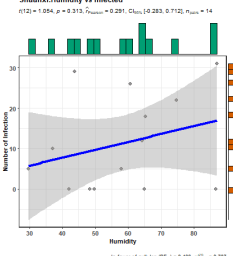

Guangxi/Humidity vs Infected  
 $t(12) = 1.828, p = 0.087, \hat{\beta}_{Humidity} = 0.487, CI_{Hum} [0.088, 0.788], n_{Hum} = 14$

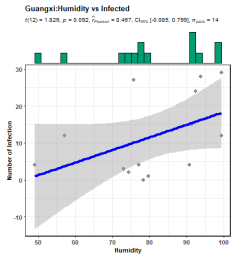

Heilongjiang/Humidity vs Infected  
 $t(12) = 1.930, p = 0.078, \hat{\beta}_{Humidity} = 0.487, CI_{Hum} [0.059, 0.938], n_{Hum} = 14$

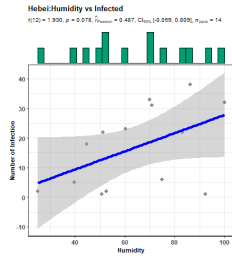

Yunnan/Humidity vs Infected  
 $t(12) = 0.940, p = 0.354, \hat{\beta}_{Humidity} = 0.262, CI_{Hum} [0.696, 0.712], n_{Hum} = 14$

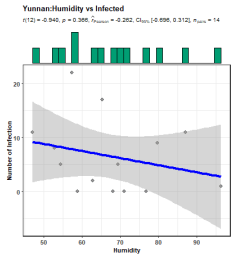

Heilongjiang/Humidity vs Infected  
 $t(12) = 0.617, p = 0.543, \hat{\beta}_{Humidity} = 0.238, CI_{Hum} [0.478, 0.343], n_{Hum} = 14$

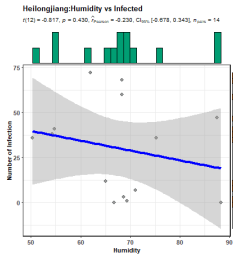

Liaoning/Humidity vs Infected  
 $t(12) = 0.684, p = 0.507, \hat{\beta}_{Humidity} = 0.186, CI_{Hum} [0.848, 0.408], n_{Hum} = 14$

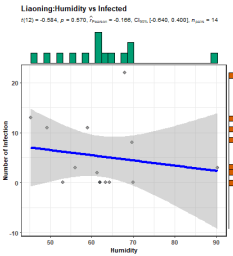

Hainan/Humidity vs Infected  
 $t(12) = 0.141, p = 0.891, \hat{\beta}_{Humidity} = 0.041, CI_{Hum} [0.688, 0.691], n_{Hum} = 14$

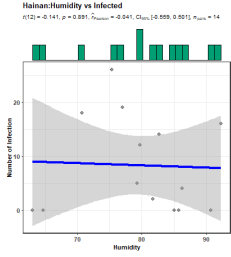

Shanxi/Humidity vs Infected  
 $t(12) = 2.162, p = 0.043, \hat{\beta}_{Humidity} = 0.622, CI_{Hum} [0.137, 0.897], n_{Hum} = 14$

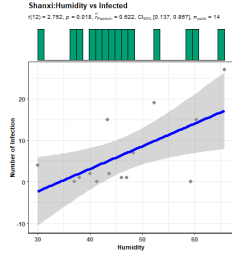

Tianjin/Humidity vs Infected  
 $t(12) = 0.980, p = 0.354, \hat{\beta}_{Humidity} = 0.280, CI_{Hum} [0.284, 0.713], n_{Hum} = 14$

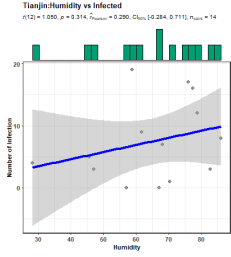

Gansu/Humidity vs Infected  
 $t(12) = 1.917, p = 0.072, \hat{\beta}_{Humidity} = 0.388, CI_{Hum} [0.216, 0.748], n_{Hum} = 14$

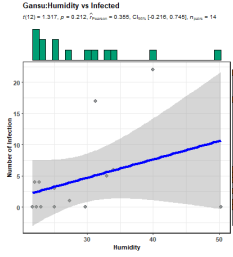

Guizhou/Humidity vs Infected  
 $t(12) = 1.107, p = 0.286, \hat{\beta}_{Humidity} = 0.384, CI_{Hum} [0.270, 0.718], n_{Hum} = 14$

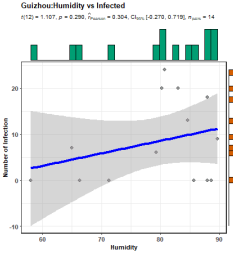

Ningxia/Humidity vs Infected  
 $t(12) = 0.917, p = 0.375, \hat{\beta}_{Humidity} = 0.148, CI_{Hum} [0.628, 0.418], n_{Hum} = 14$

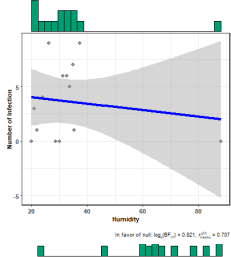

Xinjiang/Humidity vs Infected  
 $t(12) = 0.940, p = 0.368, \hat{\beta}_{Humidity} = 0.282, CI_{Hum} [0.212, 0.695], n_{Hum} = 14$

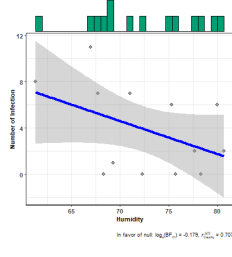

Jilin/Humidity vs Infected  
 $t(12) = 2.208, p = 0.042, \hat{\beta}_{Humidity} = 0.347, CI_{Hum} [0.626, 0.626], n_{Hum} = 14$

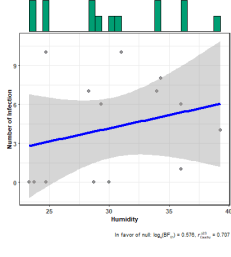

Qinghai/Humidity vs Infected  
 $t(12) = 1.187, p = 0.257, \hat{\beta}_{Humidity} = 0.317, CI_{Hum} [0.287, 0.728], n_{Hum} = 14$

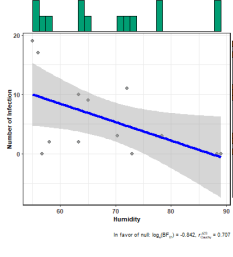

Inner Mongolia/Humidity vs Infected  
 $t(12) = 0.917, p = 0.375, \hat{\beta}_{Humidity} = 0.148, CI_{Hum} [0.628, 0.418], n_{Hum} = 14$

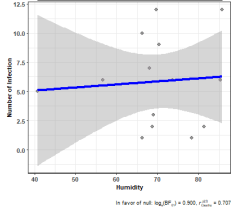

Supplement: Supplementary file 1 [file supplementary]
