# Supplementary material for: A Retrospective Analysis of Influence of Environmental/Air Temperature and Relative Humidity on SARS-CoV-2 Outbreak
Source: Preprints.org preprint supplement (doi:10.20944/preprints202003.0325.v1), 2020-03-23
Supplement: Supplementary file 1 [file supplementary]

## Sheet: 31 jan
				Temp
				00.00AM		12.00AM		18.00AM
Province/State	Confirmed	Deaths	Recovered	High	Low	High	Low	High	Low	Median T in C	Temp in F	00.00AM	12.00AM	18.00AM	Humidity
Hubei	5806	204	141	10	10	14	13	13	8	11.5	52.7	92	73	87	84
Zhejiang	538		14	11	10	15	13	13	13	13	55.4	98	83	90	90.3333
Guangdong	436		11	5	5	18	18	10	10	10	50	87	20	71	59.3333
Henan	352	2	3	3	3	12	12	9	9	9	48.2	60	29	28	39
Hunan	332		2	8	8	14	14	11	11	11	51.8	54	41	45	46.6667
Anhui	237		3	0	-2	12	9	9	3	6	42.8	99	39	49	62.3333
Jiangxi	240		7	4	4	13	13	7	7	7	44.6	88	39	62	63
Chongqing	211		1	9	8	10	9	9	8	9	48.2	84	78	86	82.6667
Sichuan	177	1	1	8	7	9	8	9	8	8	46.4	95	85	93	91
Shandong	184		2	-1	-1	11	11	6	6	6	42.8	51	32	54	45.6667
Jiangsu	168		5	1	1	11	11	3	3	3	37.4	79	30	73	60.6667
Shanghai	135	1	9	3	0	8	6	6	3	4.5	40.1	67	31	48	48.6667
Beijing	139	1	5	-5		7		7		7	44.6	71	32	16	39.6667
Fujian	120			8	6	14	10	10	9	9.5	49.1	46	39	62	49
Shaanxi	87			-3	-8	10	7	8	2	4.5	40.1	89	42	59	63.3333
Guangxi	87		2	7	3	15	13	14	9	11	51.8	87	40	61	62.6667
Hebei	82	1		-6	-6	8	8	0	0	0	32	89	37	71	65.6667
Yunnan	83		1	7	6	14	12	12	7	9.5	49.1	90	46	68	68
Heilongjiang	59	2		-24	-24	-10	-10	-19	-19	-19	-2.2	79	64	80	74.3333
Liaoning	48		1	-14	-14	1	1	-5	-5	-5	23	85	31	61	59
Hainan	52	1	1	13	13	21	21	18	18	18	64.4	81	50	74	68.3333
Shanxi	39		1	-3	-8	10	7	8	2	4.5	40.1	89	44	59	64
Tianjin	32			-4	-6	9	6	6	1	3.5	38.3	75	41	54	56.6667
Gansu	29			-8		0		-2		-2	28.4	59	35	38	44
Guizhou	29		2	8	7	9	7	8	7	7.5	45.5	60	59	58	59
Ningxia	21			-7		5		2		2	35.6	62	21	21	34.6667
Inner Mongolia	20		1	-21	-22	-8	-10	-15	-17	-16	3.2	82	66	70	72.6667
Xinjiang	17			-3	-5	4	-2	4	-4	-2.5	27.5	54	36	38	42.6667
Jilin	14		1	-25		-7		-20		-20	-4	79	51	89	73
Qinghai	8			-9		-2		-5		-5	23	35	31	29	31.6667
Hong Kong	12			15	11	19	17	17	13	16	60.8	35	34	49	39.3333

## Sheet: 1 feb
Province/State	Confirmed	Deaths	Recovered	High	Low	High	Low	High	Low	High	Low	Average	00.00AM	6.00AM	12.00AM	18.00AM
Hubei	7153	249	168
Zhejiang	599	0	21
Guangdong	535	0	14
Henan	422	2	3
Hunan	389	0	8
Anhui	297	0	5
Jiangxi	286	0	9
Chongqing	247	1	3
Sichuan	207	1	3
Shandong	206	0	3
Jiangsu	202	0	6
Shanghai	169	1	10
Beijing	168	1	9
Fujian	144	0	0
Shaanxi	101	0	0
Guangxi	100	0	2
Hebei	96	1	0
Yunnan	93	0	2
Heilongjiang	80	2	2
Liaoning	64	0	1
Hainan	62	1	1
Shanxi	47	0	1
Tianjin	41	0	0
Gansu	40	0	0
Guizhou	29	0	2
Ningxia	26	0	0
Inner Mongolia	23	0	1
Xinjiang	18	0	0
Jilin	17	0	1
Qinghai	9	0	0
Macau
Hong Kong	13	0	0

## Sheet: 2 Feb
-				Temp
				00.00AM		12.00AM		18.00AM
Province/State	Confirmed	Deaths	Recovered	High	Low	High	Low	High	Low	Median T in C	Temp in F	00.00AM	12.00AM	18.00AM	Humidity
Hubei	11177	350	295	10	8	12	11	11	8	10.5	50.9	69	62	71	67.3333
Zhejiang	661	0	32	6	4	13	11	11	9	10	50	83	49	66	66
Guangdong	632	0	15	12	12	17	17	15	15	15	59	79	56	83	72.6667
Henan	493	2	10	2	2	12	12	8	8	8	46.4	59	24	29	37.3333
Hunan	463	0	16	8	8	8	8	8	8	8	46.4	78	100	97	91.6667
Anhui	340	0	7	7	5	13	10	10	4	8.5	47.3	58	44	67	56.3333
Jiangxi	333	0	12	11	11	10	10	9	9	10	50	57	81	86	74.6667
Chongqing	300	2	7	8	8	9	8	9	8	8	46.4	87	90	91	89.3333
Sichuan	231	1	11	9	8	12	10	10	8	9.5	49.1	91	59	67	72.3333
Shandong	230	0	6	6	6	7	7	1	1	6	42.8	43	51	78	57.3333
Jiangsu	236	0	7	6	6	11	11	7	7	7	44.6	64	55	79	66
Shanghai	182	1	10	5	3	14	10	10	9	9.5	49.1	75	48	69	64
Beijing	191	1	9	2		5		2		2	35.6	64	77	21	54
Fujian	159	0	0	11	8	15	12	12	11	11.5	52.7	63	61	78	67.3333
Shaanxi	116	0	0	6	1	12	10	10	2	8	46.4	74	22	35	43.6667
Guangxi	111	0	2	11	10	11	10	10	9	10	50	86	94	97	92.3333
Hebei	104	1	3	1	1	2	2	-5	-5	1	33.8	81	68	100	83
Yunnan	105	0	3	7	4	16	12	15	6	9.5	49.1	82	36	54	57.3333
Heilongjiang	95	2	2	-20	-20	-10	-10	-16	-16	-16	3.2	59	34	58	50.3333
Liaoning	70	0	1	-11	-11	-3	-3	-8	-8	-8	17.6	79	44	81	68
Hainan	64	1	4	18	18	25	25	22	22	22	71.6	90	71	78	79.6667
Shanxi	66	0	3	-6	-6	-4	-4	-9	-9	-6	21.2	89	50	58	65.6667
Tianjin	48	0	1	0	-1	2	0	0	-3	0	32	80	80	72	77.3333
Gansu	51	0	3	-11		1		-2		-2	28.4	61	27	32	40
Guizhou	38	0	2	6	5	8	6	7	5	6	42.8	97	81	91	89.6667
Ningxia	28	0	0	-6		2		-2		-2	28.4	60	20	25	35
Inner Mongolia	27	0	1	-25	-26	-18	-18	-21	-24	-22.5	-8.5	70	64	69	67.6667
Xinjiang	21	0	0	-3	-4	5	-1	4	-2	-1.5	29.3	47	36	35	39.3333
Jilin	23	0	1	-22	-22	-8	-8	-14	-14	-14	6.8	85	40	70	65
Qinghai	11	0	0	-13	-13	-1	-1	-6	-6	-6	21.2	50	17	17	28
Hong Kong	15	0	0	17	17	21	19	19	18	18.5	65.3	76	63	68	69

## Sheet: 3- feb
				Temp
				00.00AM		6.00AM		12.00AM		18.00AM
Province/State	Confirmed	Deaths	Recovered	High	Low	High	Low	High	Low	High	Low	Average	00.00AM	6.00AM	12.00AM	18.00AM
Hubei	13522	414	386
Zhejiang	724	0	43
Guangdong	725	0	21
Henan	566	2	16
Hunan	521	0	22
Anhui	408	0	14
Jiangxi	391	0	18
Chongqing	337	2	9
Sichuan	254	1	14
Shandong	259	0	7
Jiangsu	271	0	8
Shanghai	203	1	10
Beijing	212	1	12
Fujian	179	0	1
Shaanxi	128	0	0
Guangxi	127	0	7
Hebei	113	1	3
Yunnan	117	0	5
Heilongjiang	121	2	2
Liaoning	74	0	1
Hainan	72	1	4
Shanxi	74	0	2
Tianjin	60	0	1
Gansu	55	0	3
Guizhou	46	0	2
Ningxia	31	0	1
Inner Mongolia	34	0	1
Xinjiang	24	0	0
Jilin	31	0	1
Qinghai	13	0	0
Macau
Hong Kong	15	0	0

## Sheet: 4 Feb
				Temp
				00.00AM		12.00AM		18.00AM
Province/State	Confirmed	Deaths	Recovered	High	Low	High	Low	High	Low	Median T in C	Temp in F	00.00AM	12.00AM	18.00AM	Humidity
Hubei	16678	479	522	8	5	15	12	12	5	10	50	74	48	68	63.3333
Zhejiang	829	0	62	8	7	11	5	9	5	7.5	45.5	84	74	90	82.6667
Guangdong	813	0	30	12	12	16	16	14	14	14	57.2	97	80	91	89.3333
Henan	675	2	27	2	2	10	10	3	3	3	37.4	55	34	46	45
Hunan	593	0	31	7	7	15	15	10	10	10	50	85	52	60	65.6667
Anhui	480	0	20	6	2	15	11	11	4	8.5	47.3	91	46	63	66.6667
Jiangxi	476	0	20	9	9	14	14	10	10	10	50	87	57	76	73.3333
Chongqing	366	2	9	8	5	12	10	12	8	9	48.2	90	68	76	78
Sichuan	282	1	14	10	8	14	13	13	11	12	53.6	82	52	64	66
Shandong	275	0	11	5	5	3	3	-2	-2	3	37.4	51	59	79	63
Jiangsu	308	0	12	4	4	13	13	6	6	6	42.8	94	55	89	79.3333
Shanghai	219	1	12	7	4	14	10	10	6	8.5	47.3	76	39	66	60.3333
Beijing	228	1	23	-5		1		-4		-4	24.8	61	16	35	37.3333
Fujian	194	0	3	10	10	12	11	12	11	11	51.8	90	90	90	90
Shaanxi	142	0	2	-6	-8	13	8	9	-1	3.5	38.3	86	37	59	60.6667
Guangxi	139	0	10	9	8	12	10	11	10	10	50	99	87	95	93.6667
Hebei	126	1	4	-4	-4	3	3	-2	-2	-2	28.4	91	25	38	51.3333
Yunnan	122	0	5	4	3	16	12	16	7	9.5	49.1	100	37	59	65.3333
Heilongjiang	155	2	4	-21	-21	-18	-18	-23	-23	-21	-5.8	79	58	68	68.3333
Liaoning	81	0	2	-8	-8	-10	-10	-14	-14	-10	14	76	30	42	49.3333
Hainan	80	1	5	20	20	19	19	20	20	20	68	94	93	90	92.3333
Shanxi	81	0	4	-10	-10	-1	-1	-10	-10	-10	14	58	23	49	43.3333
Tianjin	67	0	2	-3	-6	2	-2	-2	-6	-2.5	27.5	78	32	66	58.6667
Gansu	57	0	4	-11		2		0		0	32	58	22	22	34
Guizhou	58	0	2	4	4	11	6	10	3	5	41	89	69	83	80.3333
Ningxia	34	0	1	-7		4		-1		-1	30.2	47	20	31	32.6667
Inner Mongolia	35	0	1	-27	-29	-20	-21	-24	-26	-25	-13	62	56	66	61.3333
Xinjiang	29	0	0	-1	-2	5	-1	5	-1	-1	30.2	42	29	32	34.3333
Jilin	42	0	1	-22	-22	-14	-14	-19	-19	-19	-2.2	79	34	52	55
Qinghai	15	0	0	-12		0		-4		-4	24.8	25	11	13	16.3333
Hong Kong	17	1	0	18	15	18	18	19	18	18	64.4	87	79	78	81.3333

## Sheet: 5 Feb
				Temp
				00.00AM		6.00AM		12.00AM		18.00AM
Province/State	Confirmed	Deaths	Recovered	High	Low	High	Low	High	Low	High	Low	Average	00.00AM	6.00AM	12.00AM	18.00AM	Aveg
Hubei	19665	549	633
Zhejiang	895	0	78
Guangdong	895	0	49
Henan	764	2	47
Hunan	661	0	54
Anhui	530	0	23
Jiangxi	548	0	27
Chongqing	389	2	15
Sichuan	301	1	24
Shandong	307	0	15
Jiangsu	341	0	23
Shanghai	243	1	15
Beijing	253	1	24
Fujian	205	0	11
Shaanxi	165	0	6
Guangxi	150	0	13
Hebei	135	1	6
Yunnan	128	0	5
Heilongjiang	190	2	7
Liaoning	89	0	4
Hainan	99	1	5
Shanxi	81	0	5
Tianjin	69	1	2
Gansu	64	1	9
Guizhou	62	0	6
Ningxia	34	0	1
Inner Mongolia	42	0	3
Xinjiang	32	0	0
Jilin	54	0	2
Qinghai	17	0	3
Macau
Hong Kong	21	1	0

## Sheet: 6 feb
				Temp
2020-02-06				00.00AM		12.00AM		18.00AM		Median	T in F	00.00AM	12.00AM	18.00AM	Aveg
country	confirmed	death	recovered	High	Low	High	Low	High	Low	Median T in C	Temp in F	00.00AM	12.00AM	18.00AM	Humidity
Hubei	22112	618	817	7	6	5	5	4	4	5	41	83	87	87	85.6667
Zhejiang	954	0	94	7	7	7	6	6	5	6.5	43.7	77	84	92	84.3333
Guangdong	970	0	69	16	16	17	17	17	17	17	62.6	88	77	88	84.3333
Henan	851	2	56	-4	-4	-2	-2	-2	-2	-2	28.4	91	91	91	91
Hunan	711	0	81	6	6	3	3	3	3	3	37.4	97	100	96	97.6667
Anhui	591	0	34	5	4	4	4	4	3	4	39.2	82	100	100	94
Jiangxi	600	0	37	11	11	7	7	8	7	7.5	45.5	75	97	95	89
Chongqing	411	2	24	9	8	10	10	9	9	9	48.2	89	88	93	90
Sichuan	321	1	31	10	9	16	16	12	10	11	51.8	84	36	59	59.6667
Shandong	347	0	27	-1	-1	0	0	0	0	0	32	58	81	86	75
Jiangsu	373	0	34	6	6	5	5	4	4	5	41	75	92	96	87.6667
Beijing	274	1	31	-7	-7	-4	-4	-5	-5	-5	23	70	84	90	81.3333
Shanghai	257	1	25	5	5	6	5	5	5	5	41	86	81	82	83
Fujian	215	0	14	12	12	11	11	11	10	11	51.8	66	82	85	77.6667
Shaanxi	173	0	9	0	-1	0	0	0	0	0	32	95	80	86	87
Guangxi	168	0	14	10	10	12	12	12	10	11	51.8	100	100	98	99.3333
Hebei	157	1	13	-3	-3	0	0	-6	-6	-3	26.6	71	57	85	71
Yunnan	133	0	7	9	8	15	15	12	6	10.5	50.9	61	29	51	47
Heilongjiang	227	3	8	-24	-24	-13	-13	-18	-18	-18	-0.4	69	52	65	62
Liaoning	94	0	5	-20	-20	-5	-5	-8	-8	-8	17.6	71	29	36	45.3333
Hainan	106	1	8	20	20	26	26	23	23	23	73.4	92	59	75	75.3333
Shanxi	96	0	12	-10	-10	-2	-2	-9	-9	-9	15.8	57	46	78	60.3333
Tianjin	79	1	2	-4	-5	-2	-2	-3	-6	-3.5	25.7	82	69	85	78.6667
Gansu	62	0	6	-7	-7	4	4	3	3	3	37.4	51	24	24	33
Guizhou	71	1	6	9	8	8	8	7	7	8	46.4	97	76	81	84.6667
Ningxia	40	0	1	-6	-6	5	5	2	2	2	35.6	50	20	24	31.3333
Inner Mongolia	46	0	4	-25	-25	-14	-14	-17	-20	-18.5	-1.3	65	60	76	67
Xinjiang	36	0	0	-1	-2	5	5	7	0	2.5	36.5	43	28	31	34
Jilin	59	0	4	-31	-31	-14	-14	-23	-23	-23	-9.4	67	45		56
Qinghai	18	0	3	-7	-7	2	2	-3	-3	-3	26.6	23	12	17	17.3333
Hong Kong	24	1	0	18	17	20	19	19	19	19	66.2	70	65	69	68

## Sheet: 7-Feb
				Temp
				00.00AM		6.00AM		12.00AM		18.00AM
Province/State	Confirmed	Deaths	Recovered	High	Low	High	Low	High	Low	High	Low	Average	00.00AM	6.00AM	12.00AM	18.00AM	Aveg
Hubei
Zhejiang
Guangdong
Henan
Hunan
Anhui
Jiangxi
Chongqing
Sichuan
Shandong
Jiangsu
Shanghai
Beijing
Fujian
Shaanxi
Guangxi
Hebei
Yunnan
Heilongjiang
Liaoning
Hainan
Shanxi
Tianjin
Gansu
Guizhou
Ningxia
Inner Mongolia
Xinjiang
Jilin
Qinghai
Macau
Hong Kong

## Sheet: 8 Feb
				Temp
				00.00AM		12.00AM		18.00AM
Province/State	Confirmed	Deaths	Recovered	High	Low	High	Low	High	Low	Median T in C	Temp in F	00.00AM	12.00AM	18.00AM	Humidity
Hubei	27100	780	1439	5	4	9	7	8	4	6	42.8	84	67	80	77
Zhejiang	1048	0	175	7	7	9	8	8	7	7.5	45.5	90	68	73	77
Guangdong	1095	1	112	15	15	18	18	16	16	16	60.8	82	63	70	71.6667
Henan	981	4	116	2	2	10	10	8	8	8	46.4	90	41	50	60.3333
Hunan	803	1	156	3	3	7	7	5	5	5	41	90	68	86	81.3333
Anhui	733	0	59	5	5	8	7	7	3	6	42.8	100	76	92	89.3333
Jiangxi	698	0	55	7	7	11	11	8	8	8	46.4	84	56	71	70.3333
Chongqing	428	2	39	9	9	13	11	11	10	10.5	50.9	86	76	89	83.6667
Sichuan	364	1	60	9	8	12	10	12	9	9.5	49.1	88	64	79	77
Shandong	416	0	44	3	3	8	8	2	2	3	37.4	75	56	81	70.6667
Jiangsu	439	0	51	6	6	9	9	8	8	8	46.4	96	69	76	80.3333
Shanghai	286	1	41	6	6	10	8	8	5	7	44.6	81	61	74	72
Beijing	315	2	34	-8	-8	7		1		-3.5	25.7	89	29	51	56.3333
Fujian	239	0	24	12	11	13	12	12	11	12	53.6	78	62	67	69
Shaanxi	195	0	20	-1	-6	11	7	8	-3	3	37.4	92	53	79	74.6667
Guangxi	183	0	17	8	7	9	8	9	8	8	46.4	92	91	91	91.3333
Hebei	195	1	30	-6	-6	4	4	-2	-2	-2	28.4	100	63	96	86.3333
Yunnan	138	0	17	8	5	16	14	14	10	12	53.6	80	56	72	69.3333
Heilongjiang	295	5	13	-23	-23	-11	-11	-15	-15	-15	5	77	57	71	68.3333
Liaoning	105	0	8	-13	-13	-1	-1	-6	-6	-6	21.2	81	38	58	59
Hainan	124	2	14	20	20	23	23	19	19	20	68	87	72	53	70.6667
Shanxi	115	0	21	-8	-8	1	1	-6	-6	-6	21.2	60	44	53	52.3333
Tianjin	88	1	4	-1	-7	8	2	2	-4	0.5	32.9	89	30	66	61.6667
Gansu	79	1	12	-7		6		1		1	33.8	51	19	24	31.3333
Guizhou	89	1	7	4	4	6	5	5	4	4.5	40.1	90	83	91	88
Ningxia	45	0	15	-6		7		0		0	32	59	16	26	33.6667
Inner Mongolia	52	0	5	-18	-20	-9	-10	-11	-13	-12	10.4	82	68	76	75.3333
Xinjiang	42	0	0	0	-1	8	2	8	0	1	33.8	38	23	27	29.3333
Jilin	69	1	4	-16	-16	-9	-9	-19	-19	-16	3.2	71	39	80	63.3333
Qinghai	18	0	3	-7		1		-4		-4	24.8	21	12	18	17
Hong Kong	26	1	0	19	16	19	17	18	15	17.5	63.5	73	68	65	68.6667

## Sheet: 9-Feb
				Temp
				00.00AM		6.00AM		12.00AM		18.00AM
Province/State	Confirmed	Deaths	Recovered	High	Low	High	Low	High	Low	High	Low	Average	00.00AM	6.00AM	12.00AM	18.00AM	Aveg
Hubei
Zhejiang
Guangdong
Henan
Hunan
Anhui
Jiangxi
Chongqing
Sichuan
Shandong
Jiangsu
Shanghai
Beijing
Fujian
Shaanxi
Guangxi
Hebei
Yunnan
Heilongjiang
Liaoning
Hainan
Shanxi
Tianjin
Gansu
Guizhou
Ningxia
Inner Mongolia
Xinjiang
Jilin
Qinghai
Macau
Hong Kong

[truncated: 32 more sheets: 10 Feb, 11 Feb, 12 Feb, 13 Feb, 14 Feb, 15 Feb, 16 Feb, 17 Feb, 18 feb, 19 Feb, 20 feb, 21 Feb, 22 feb, 23 Feb, 24 feb, 25 Feb, 26 Feb, 27 Feb, 28 feb, new parameters …]
