# Supplementary material for: A Retrospective Analysis of Influence of Environmental/Air Temperature and Relative Humidity on SARS-CoV-2 Outbreak
Source: Preprints.org preprint supplement (doi:10.20944/preprints202003.0325.v1), 2020-03-23
Supplement: Supplementary file 6 [file Table S3.xlsx]

## Sheet: 70 state_Cities_Countries 
					Temp ©	Temp ©	RH	RH	Temp (F)	Temp (F)	Median Temp (F)	Median RH
	State/City	Infection	Death	Recover	February	March	February	March	February	March	Median	Median
France	Réunion	1	0	0	27	27	73	83	80.6	80.6	80.6	78
Japan	Shizuoka	1	0	0	9	12	63	71	48.2	53.6	50.9	67
South Korea	Gyeong-gi	1	0	0	2	4	73	66	35.6	39.2	37.4	69.5
US	Mississippi	1	0	0	8	13	75	70	46.4	55.4	50.9	72.5
France	Saint-Martin,	2	0	0	26	26	74	71	78.8	78.8	78.8	72.5
Australia	Tasmania	3	0	0	16	15	82	79	60.8	59	59.9	80.5
Japan	Fukuoka	3	0	0	9	10	68	70	48.2	50	49.1	69
Japan	Okinawa,	3	0	0	19	9	69	77	66.2	48.2	57.2	73
Spain	Almeria	3	0	0	14	17	76	66	57.2	62.6	59.9	71
Germany	Saarland	4	0	0	6	6	82	84	42.8	42.8	42.8	83
South Korea	Jeju-do	4	0	0	9	10	66	66	48.2	50	49.1	66
Spain	Caceres	4	1	1	7	9	80	76	44.6	48.2	46.4	78
France	Guyane	5	0	0	27	27	78	75	80.6	80.6	80.6	76.5
Spain	Badajoz	5	0	0	14	16	81	73	57.2	60.8	59	77
Switzerland	Jura	5	0	0	6	6	79	79	42.8	42.8	42.8	79
Spain	Sevilla	7	0	0	15	17	75	66	59	62.6	60.8	70.5
Switzerland	Zug	7	0	0	6	6	67	73	42.8	42.8	42.8	70
Itally	Basilicata	8	0	0	14	14	60	63	57.2	57.2	57.2	61.5
Australia	South Australia	9	0	2	21	20	56	58	69.8	68	68.9	57
US	Virginia	10	0	0	9	12	72	64	48.2	53.6	50.9	68
US	Maryland	12	0	0	5	9	72	62	41	48.2	44.6	67
Itally	Molise	16	0	0	12	12	70	73	53.6	53.6	53.6	71.5
Itally	Calabria	19	0	2	14	13	69	72	57.2	55.4	56.3	70.5
Australia	Queensland	20	0	8	30	26	33	42	86	78.8	82.4	37.5
Australia	Victoria	21	0	7	18	16	79	74	64.4	60.8	62.6	76.5
Germany	Bremen	21	0	0	6	6	82	80	42.8	42.8	42.8	81
Switzerland	Neuchatel	27	0	0	3	2	75	83	37.4	35.6	36.5	79
Iran	kohgiluyeh and boyer-ahmad	32	0	0	13	15	57	50	55.4	59	57.2	53.5
Itally	Sardinia	37	0	0	12	13	76	80	53.6	55.4	54.5	78
Iran	Bushehr	38	0	0	17	19	58	59	62.6	66.2	64.4	58.5
Spain	Burgos	39	0	0	9	10	80	73	48.2	50	49.1	76.5
Iran	chaharmahal and bakhtiari	52	0	0	15	18	58	51	59	64.4	61.7	54.5
Switzerland	Zurich	59	0	2	6	6	67	73	42.8	42.8	42.8	70
Australia	New South Wales	66	2	4	23	20	74	81	73.4	68	70.7	77.5
Japan	Tokyo	67	2	0	8	10	56	71	46.4	50	48.2	63.5
Iran	sistan and baluchestan	71	0	0	13	12	41	28	55.4	53.6	54.5	34.5
Spain	Barcelona	72	3	0	13	13	78	68	55.4	55.4	55.4	73
Japan	Osaka	73	0	0	10	12	59	60	50	53.6	51.8	59.5
Germany	Lower Saxony	75	0	1	6	6	82	80	42.8	42.8	42.8	81
Itally	Bolzano	75	0	0	7	8	51	64	44.6	46.4	45.5	57.5
Itally	Sicily	83	0	2	12	13	70	71	53.6	55.4	54.5	70.5
US	Massachusetts	95	0	1	3	7	58	55	37.4	44.6	41	56.5
South Korea	Busan	98	1	21	6	8	58	57	42.8	46.4	44.6	57.5
Japan	Aichi	99	3	0	9	11	74	75	48.2	51.8	50	74.5
Switzerland	Vaud	108	1	0	6	6	76	75	42.8	42.8	42.8	75.5
Japan	Hokkaidō	111	3	0	-6	-2	80	80	21.2	28.4	24.8	80
Switzerland	Ticino	120	1	0	2	3	68	68	35.6	37.4	36.5	68
Itally	Lazio	150	6	19	13	14	63	63	55.4	57.2	56.3	63
Spain	Alava	153	3	0	13	11	76	82	55.4	51.8	53.6	79
US	California	179	4	2	11	11	35	55	51.8	51.8	51.8	45
South Korea	Seoul	193	0	37	2	4	73	66	35.6	39.2	37.4	69.5
Itally	Liguria	194	8	5	13	13	64	65	55.4	55.4	55.4	64.5
US	New York	216	0	0	5	9	64	53	41	48.2	44.6	58.5
France	Hauts-de-France	263	15	0	8	8	83	84	46.4	46.4	46.4	83.5
France	Auvergne-Rhône-Alpes	264	3	8	7	8	74	72	44.6	46.4	45.5	73
Germany	Baden-Württemberg	277	0	2	7	8	76	79	44.6	46.4	45.5	77.5
Germany	Bavaria	366	0	14	5	6	77	76	41	42.8	41.9	76.5
US	Washington	373	30	1	7	11	65	53	44.6	51.8	48.2	59
Germany	North Rhine-Westphalia	484	2	1	7	7	81	83	44.6	44.6	44.6	82
France	Île-de-France	492	4	5	8	7	82	83	46.4	44.6	45.5	82.5
France	Great East	578	6	0	7	7	87	88	44.6	44.6	44.6	87.5
Belgium		689	4	1	7	7	79	82	44.6	44.6	44.6	80.5
Itally	Lombardy	728	617	900	8	8	63	75	46.4	46.4	46.4	69
Iran	Qom	1023			9	13	48	35	48.2	55.4	51.8	41.5
Itally	Veneto	1023	29	54	8	9	76	79	46.4	48.2	47.3	77.5
Spain	Madrid	1024	31	0	13	15	68	57	55.4	59	57.2	62.5
Iran	Isfahan	1301	0	0	6	9	39	27	42.8	48.2	45.5	33
Iran	Mazandaran	1374	0	0	7	13	47	34	44.6	55.4	50	40.5
Itally	Emilia Romagna	1739	113	38	8	9	67	75	46.4	48.2	47.3	71
Iran	Tehran	3774			7	13	47	34	44.6	55.4	50	40.5
South Korea	Daegu	5794	43	102	5	7	59	55	41	44.6	42.8	57

## Sheet: Temperate Countries
				Temp (C)	Temp (C)	RH	RH	Temp (F)	Temp (F)		RH
				Feb	march	Feb	march	Feb	march	median (F)	median
Nepal	1	0	1	12	15	74	70	53.6	59	56.3	72
Cambodia	7	0	1	27	30	61	66	80.6	86	83.3	63.5
Bangladesh	8			23	26	63	60	73.4	78.8	76.1	61.5
Pakisthan	107			22	23	40	39	71.6	73.4	72.5	39.5
India				17	20	78	81	62.6	68	65.3	79.5
Kerala	22	0	3	29	29	69	75	84.2	84.2	84.2	72
Rajasthan	4	0	1	20	21	45	50	68	69.8	68.9	47.5
South Africa	38			21	20	71	74	69.8	68	68.9	72.5
									Grand Median	71.9375	63.5
