# Supplementary figures and images for: A Retrospective Analysis of Influence of Environmental/Air Temperature and Relative Humidity on SARS-CoV-2 Outbreak
Source: Preprints.org preprint supplement (doi:10.20944/preprints202003.0325.v1), 2020-03-23

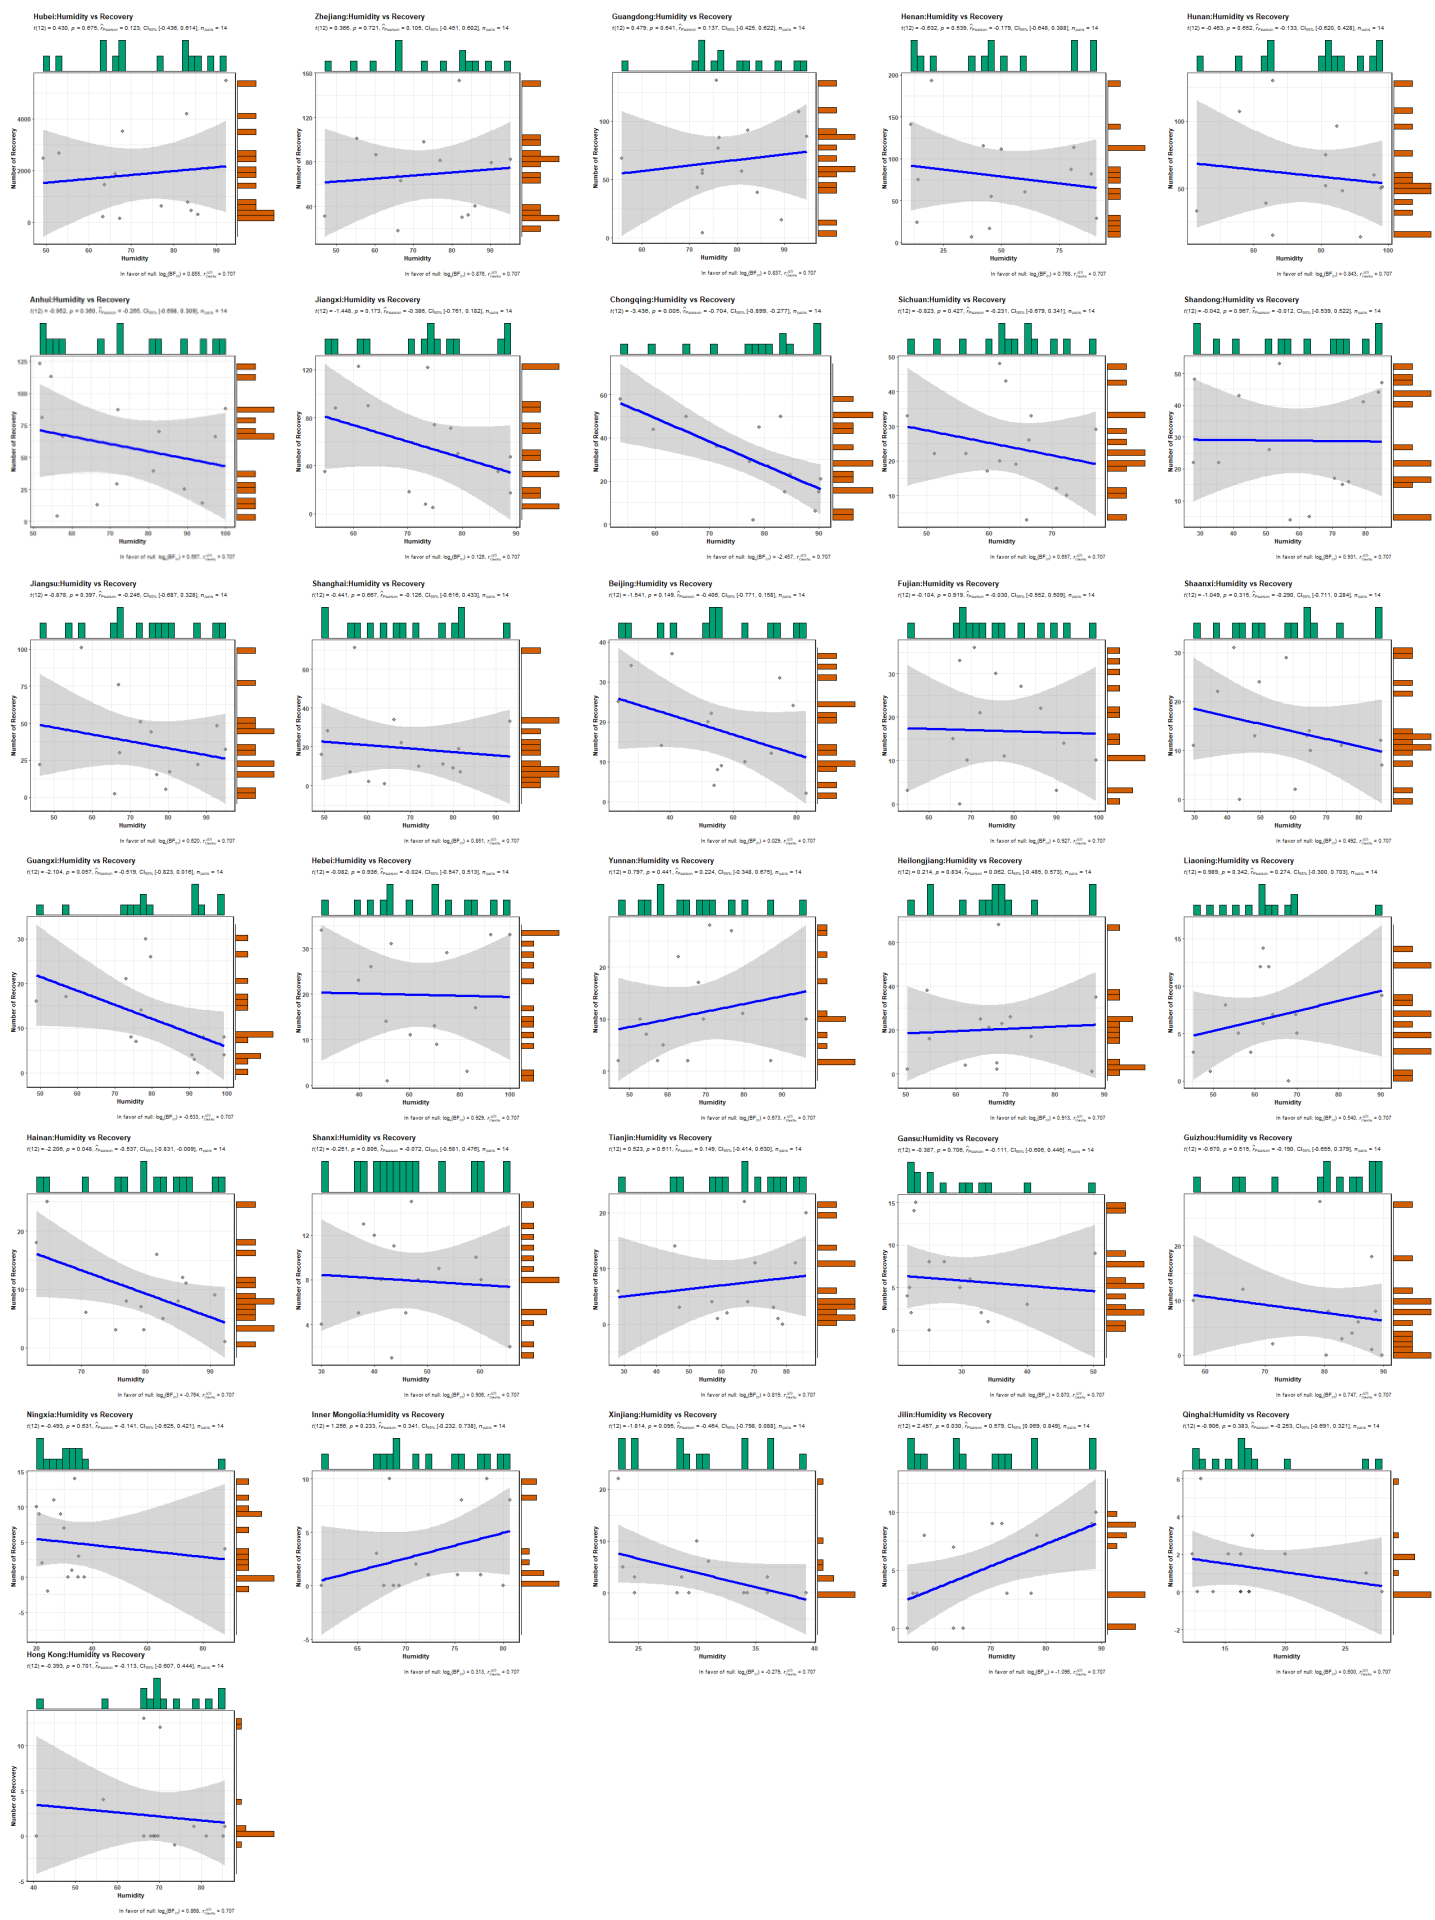

Supplement: Supplementary file 2 [file supplementary]

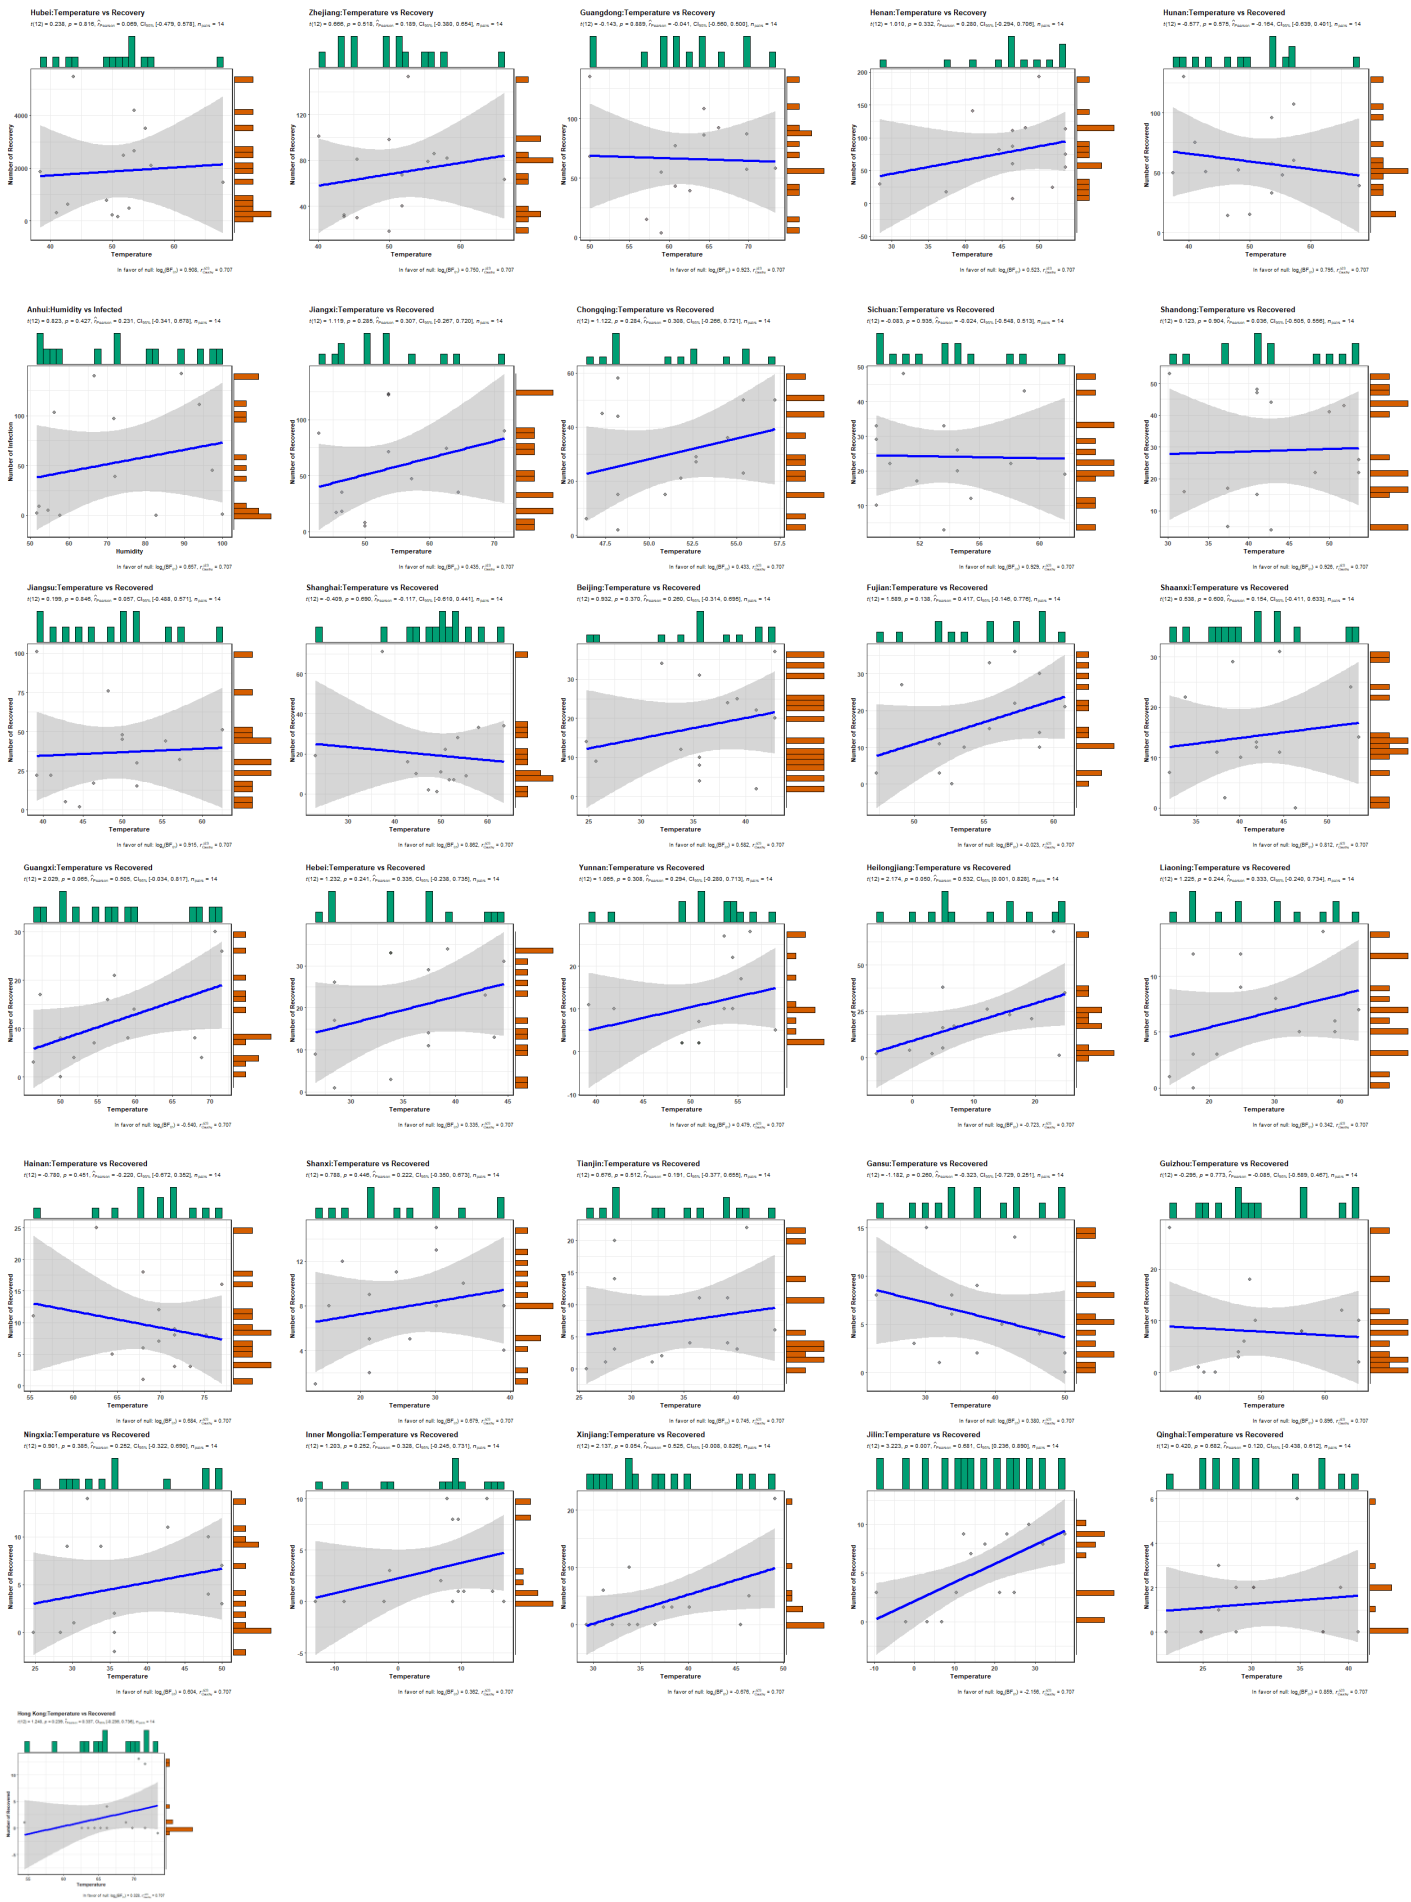

Supplement: Supplementary file 3 [file supplementary]

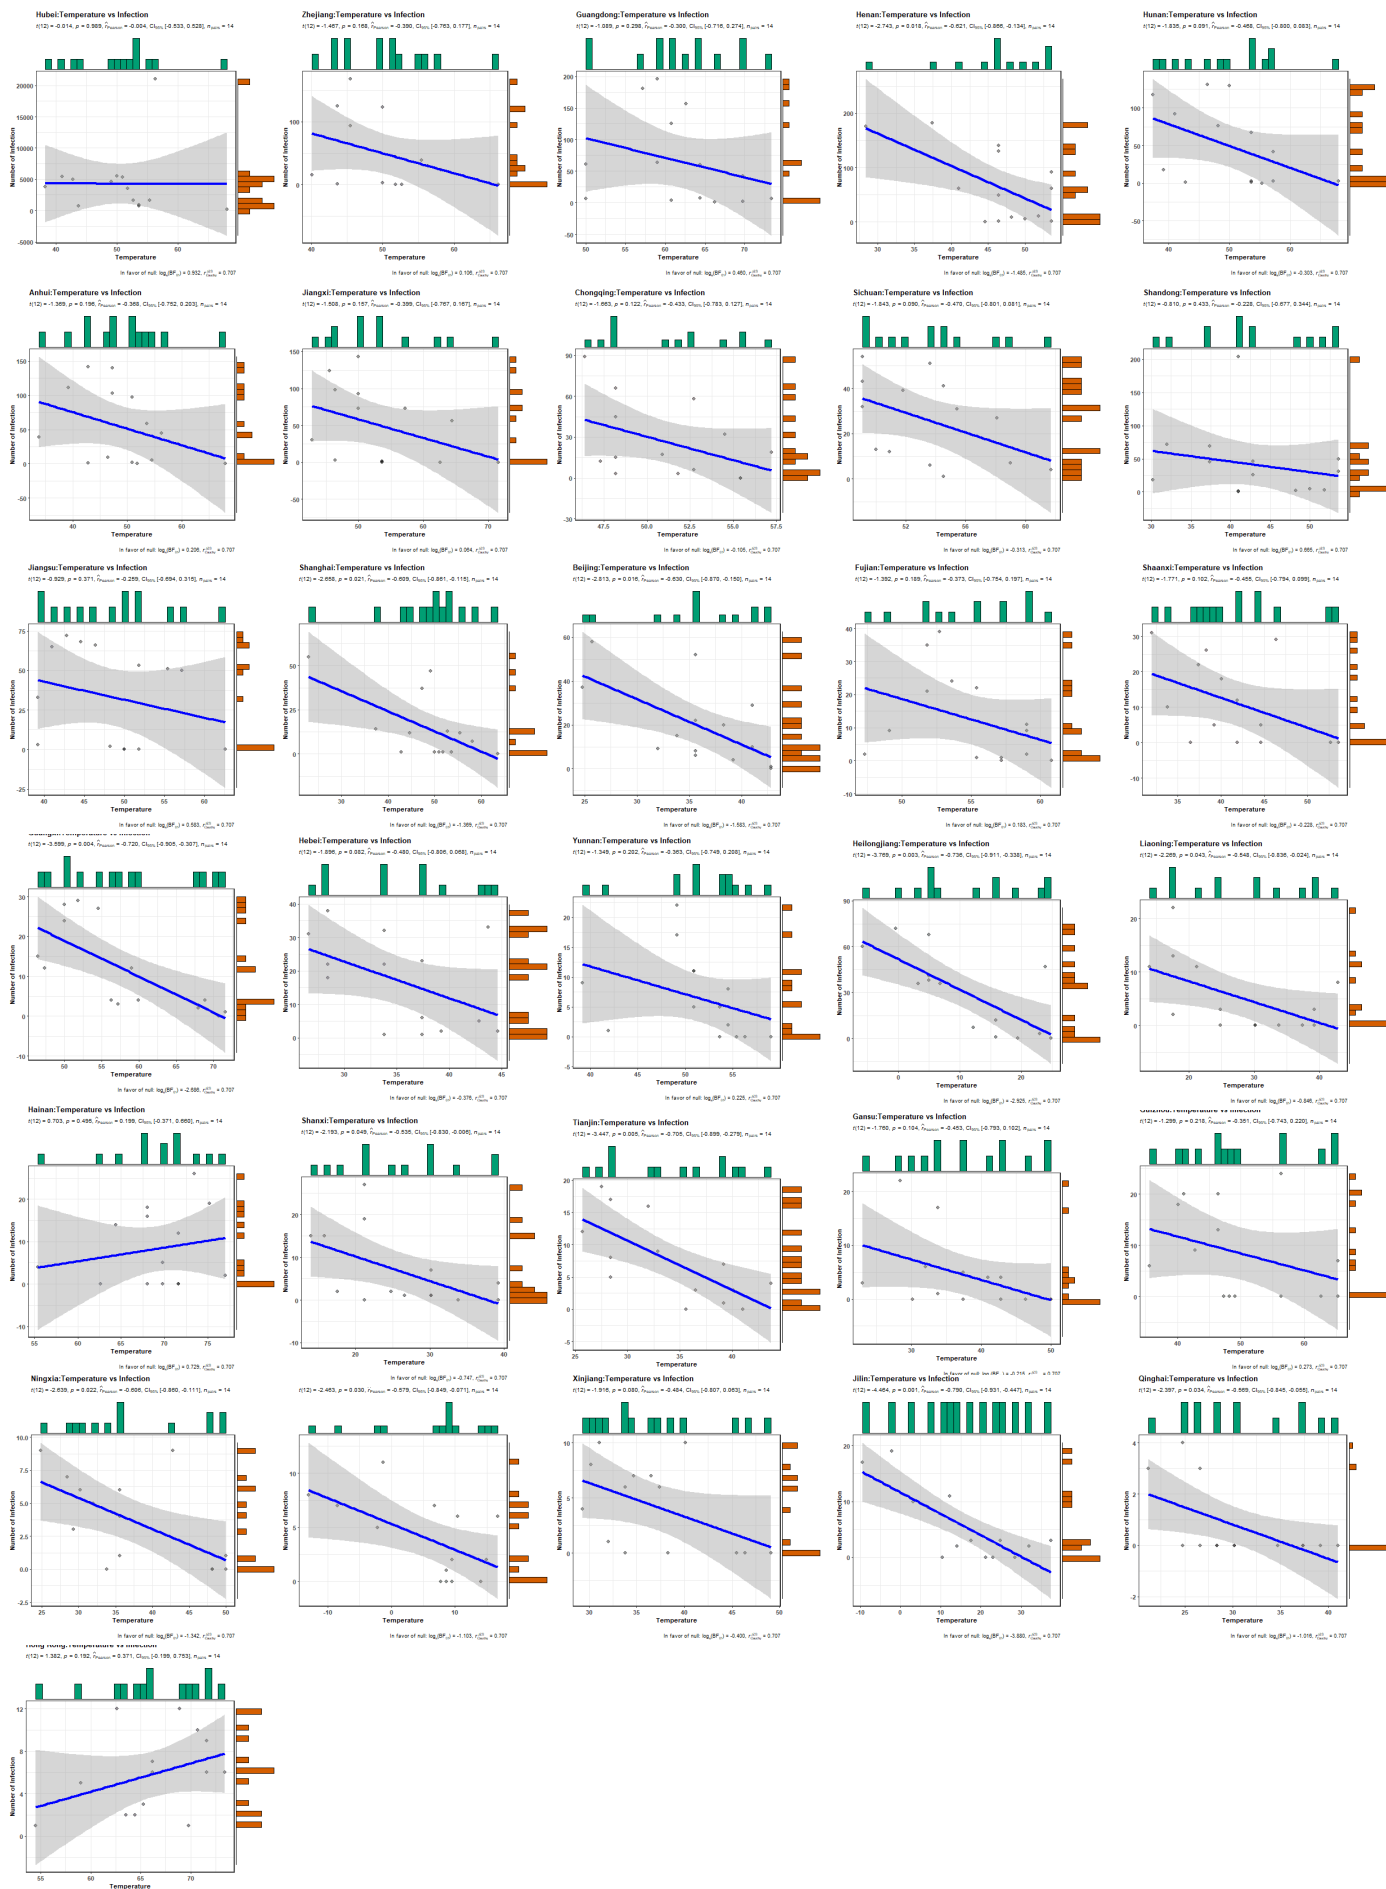

Supplement: Supplementary file 4 [file supplementary]
